# Supplementary material for: Ultrafast kinetics in a phase separating electrode material by forming an intermediate phase without reducing the particle size
Source: Royal Society of Chemistry journal article supplement (doi:10.1039/d0ee02518f), 2020-01-01
Supplement: d0ee02518f1.pdf [file d0ee02518f1.pdf]

## Supporting Information

### **Ultrafast kinetics in a phase separating electrode material by forming an intermediate phase without reducing the particle size**

Minkyung Kim<sup>†‡</sup>, Mihee Jeong<sup>§</sup>, Won-Sub Yoon<sup>§</sup>, Byoungwoo Kang<sup>†\*</sup>

<sup>†</sup>Department of Materials Science and Engineering, Pohang University of Science and Technology (POSTECH), Pohang 37673, Republic of Korea

<sup>‡</sup> Energy Storage and Distributed Resources Division, Lawrence Berkeley National Laboratory, Berkeley, California 94720, United States

<sup>§</sup>Department of Energy Science, Sungkyunkwan University, Suwon, 440-746, Republic of Korea

**Table S1.** Lattice parameters of PTFE-LiVPO<sub>4</sub>F and CTR-LiVPO<sub>4</sub>F by Rietveld refinement

| PTFE-LiVPO <sub>4</sub> F                                                                                                                                                   |                  |               |               |               |      |                                          |
|-----------------------------------------------------------------------------------------------------------------------------------------------------------------------------|------------------|---------------|---------------|---------------|------|------------------------------------------|
| P $\bar{1}$ : Z=2<br>a = 5.1835(4) Å, b = 5.3124(2) Å, c = 7.2672(2) Å<br>alpha = 107.582(3)°, beta = 107.955(2)°, gamma = 98.447(7)°<br>Volume = 175.007(8) Å <sup>3</sup> |                  |               |               |               |      | Bragg R-factor: 6.62<br>RF-factor : 5.17 |
| Atomic Parameters                                                                                                                                                           |                  |               |               |               |      |                                          |
| Atoms                                                                                                                                                                       | Wyckoff position | x/a           | y/b           | z/c           | Occ. | B <sub>iso</sub>                         |
| V(1)                                                                                                                                                                        | 1a               | 0             | 0             | 0             | 1    | 0.404                                    |
| V(2)                                                                                                                                                                        | 1b               | 0             | 0             | 0.5           | 1    | 0.306                                    |
| P                                                                                                                                                                           | 2i               | 0.31889(90)   | 0.64652(87)   | 0.24986(83)   | 1    | 0.557                                    |
| O(1)                                                                                                                                                                        | 2i               | 0.36980(177)  | 0.24044(148)  | 0.58599(137)  | 1    | 0.842                                    |
| O(2)                                                                                                                                                                        | 2i               | 0.11048(186)  | -0.32998(146) | 0.36133(139)  | 1    | 0.299                                    |
| O(3)                                                                                                                                                                        | 2i               | 0.68291(180)  | 0.66372(180)  | -0.13847(125) | 1    | 0.752                                    |
| O(4)                                                                                                                                                                        | 2i               | 0.27067(157)  | 0.79328(152)  | 0.08892(129)  | 1    | 0.425                                    |
| F                                                                                                                                                                           | 2i               | -0.11871(137) | 0.64652( 87)  | 0.24535(117)  | 1    | 0.417                                    |
| Li                                                                                                                                                                          | 2i               | 0.70771(656)  | 0.38817(593)  | 0.22343(476)  | 1    | 2.635                                    |
| CTR-LiVPO <sub>4</sub> F                                                                                                                                                    |                  |               |               |               |      |                                          |
| P $\bar{1}$ : Z=2<br>a = 5.1752(6) Å, b = 5.3086(7) Å, c = 7.2653(5) Å<br>alpha = 107.571(1)°, beta = 107.980(8)°, gamma = 98.354(4)°<br>Volume = 174.627(7) Å <sup>3</sup> |                  |               |               |               |      | Bragg R-factor: 7.33<br>RF-factor : 5.99 |
| Atomic Parameters                                                                                                                                                           |                  |               |               |               |      |                                          |
| Atoms                                                                                                                                                                       | Wyckoff position | x/a           | y/b           | z/c           | Occ. | B <sub>iso</sub>                         |
| V(1)                                                                                                                                                                        | 1a               | 0             | 0             | 0             | 1    | 0.404                                    |
| V(2)                                                                                                                                                                        | 1b               | 0             | 0             | 0.5           | 1    | 0.306                                    |
| P                                                                                                                                                                           | 2i               | 0.31839(92)   | 0.64696(94)   | 0.25105(83)   | 1    | 0.557                                    |
| O(1)                                                                                                                                                                        | 2i               | 0.36980(177)  | 0.24044(148)  | 0.58599(137)  | 1    | 0.842                                    |
| O(2)                                                                                                                                                                        | 2i               | 0.11048(186)  | -0.32998(146) | 0.36133(139)  | 1    | 0.299                                    |
| O(3)                                                                                                                                                                        | 2i               | 0.68980(190)  | 0.66587(193)  | -0.13714(134) | 1    | 0.752                                    |
| O(4)                                                                                                                                                                        | 2i               | 0.27660(167)  | 0.78845(164)  | 0.08893(139)  | 1    | 0.425                                    |
| F                                                                                                                                                                           | 2i               | -0.11544(149) | 0.09029(149)  | 0.24906(124)  | 1    | 0.417                                    |
| Li                                                                                                                                                                          | 2i               | 0.70426(693)  | 0.39044(631)  | 0.20041(469)  | 1    | 2.635                                    |

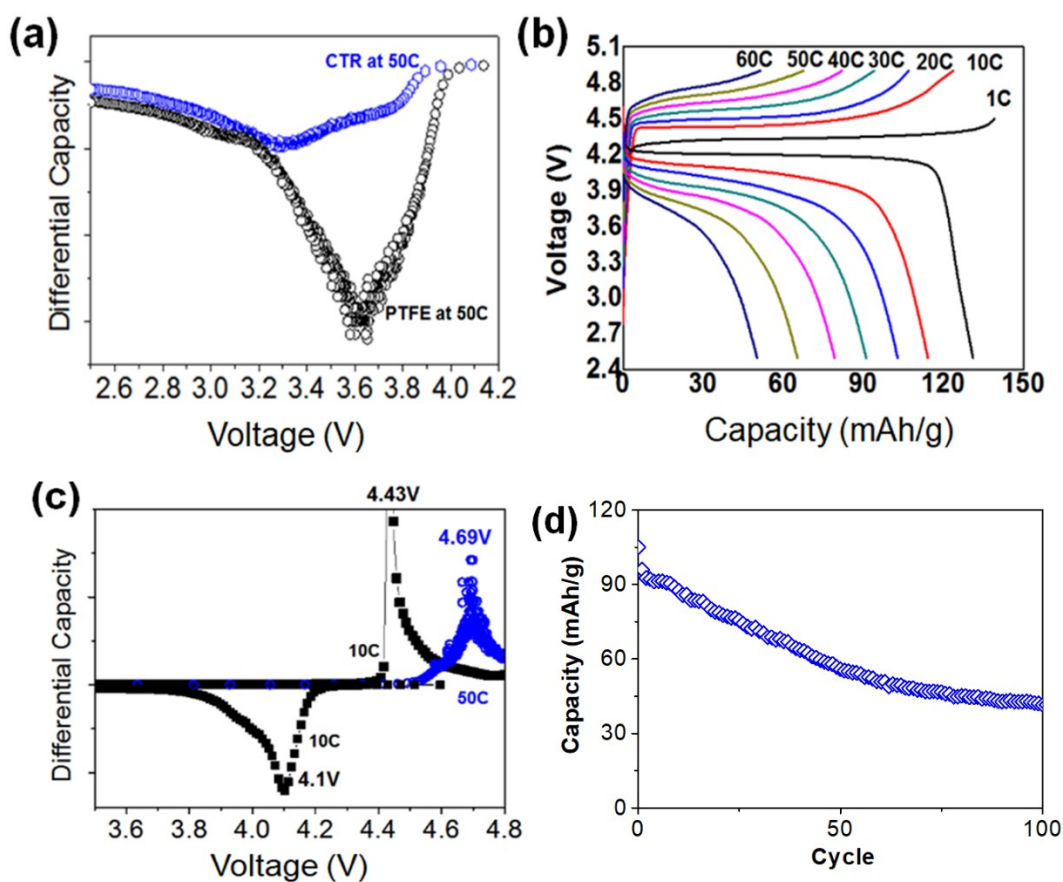

**Figure S1.** (a) Differential capacity plot of PTFE-LiVPO<sub>4</sub>F and CTR-LiVPO<sub>4</sub>F of **Figure 2a** and **2b** (a 50C discharge rate). Voltage polarization is much higher in CTR-LiVPO<sub>4</sub>F sample than the PTFE-LiVPO<sub>4</sub>F. (b) Voltage profiles of **Figure 2e** of PTFE-LiVPO<sub>4</sub>F (c) Differential capacity plot ( $dQ/dV$ ) of (b) at a 10C and 50C charge rate. (d) Cycle retention of CTR-LiVPO<sub>4</sub>F. It was charged and discharged at 1C rate (4.5-3V).

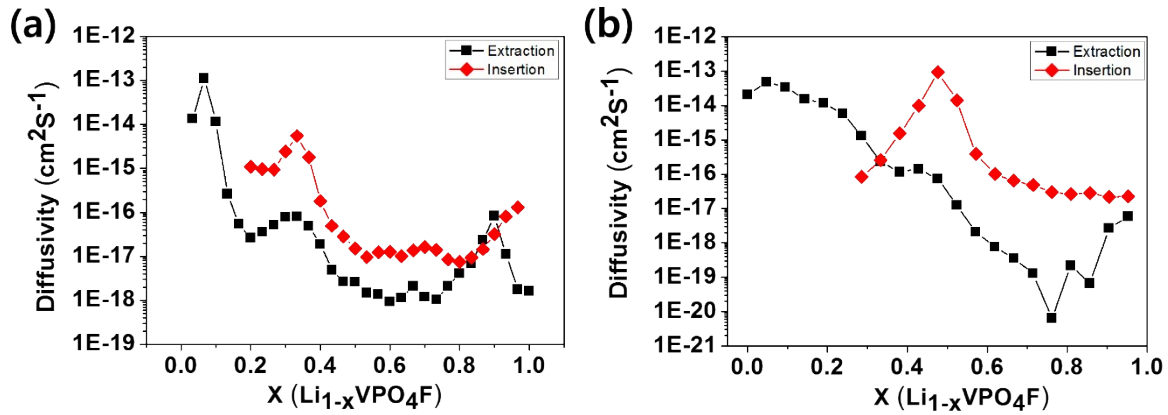

**Figure S2.** Calculated Li ion diffusivity from galvanostatic intermittent titration technique (GITT) method of (a) PTFE-LiVPO<sub>4</sub>F and (b) CTR-LiVPO<sub>4</sub>F.

This calculation was based on the below equation (1) developed by Weppner et. al.

$$D_{Li^+} = \frac{4}{\pi} \left( \frac{V_M}{SF} \right)^2 \left( I_0 \frac{\delta E_s / \delta x}{\delta E / \delta t^{1/2}} \right)^2 \text{ at } t \ll \tau \text{ ----- (1)}$$

where  $V_M$  is molar volume  $5.2346 \times 10^{-5} \text{ m}^3/\text{mol}$ ,  $S$  is the electrode surface area of each samples,  $F$  is the Faraday's constant  $96,485.3365 \text{ C/mol}$ ,  $I_0$  is the pulse current,  $\delta E_s / \delta x$  is the slope of equilibrium open circuit voltage (OCV) with respect to Li amount, which can be obtained from the differential of OCV curve, and  $\delta E / \delta t^{1/2}$  is the slope of initial transient voltage change with respect to square root of time.

The diffusivities are changed depending on the lithium composition in both samples, PTFE-LiVPO<sub>4</sub>F and CTR-LiVPO<sub>4</sub>F. In both LiVPO<sub>4</sub>F samples, carbon was included with LiVPO<sub>4</sub>F, so the surface area of the composite sample (LiVPO<sub>4</sub>F + carbon) was considered. The measured Li diffusivity of PTFE-LiVPO<sub>4</sub>F was compared with the reported Li diffusivity of LiVPO<sub>4</sub>F by P.F. Xiao et. al.<sup>1</sup> The range of the two diffusivities are similar to each other.

**Table S2.** Electronic conductivities of the composite samples that have LiVPO<sub>4</sub>F and carbon. Each sample was pelletized, and then Ag paste was put on the top and bottom of the pellets. Direct current (DC) measurement was conducted to the pellets with stainless collector.

| <b>PTFE-LiVPO<sub>4</sub>F</b>    | <b>CTR-LiVPO<sub>4</sub>F</b>     |
|-----------------------------------|-----------------------------------|
| <b>9.0 x 10<sup>-3</sup> S/cm</b> | <b>6.4 x 10<sup>-3</sup> S/cm</b> |

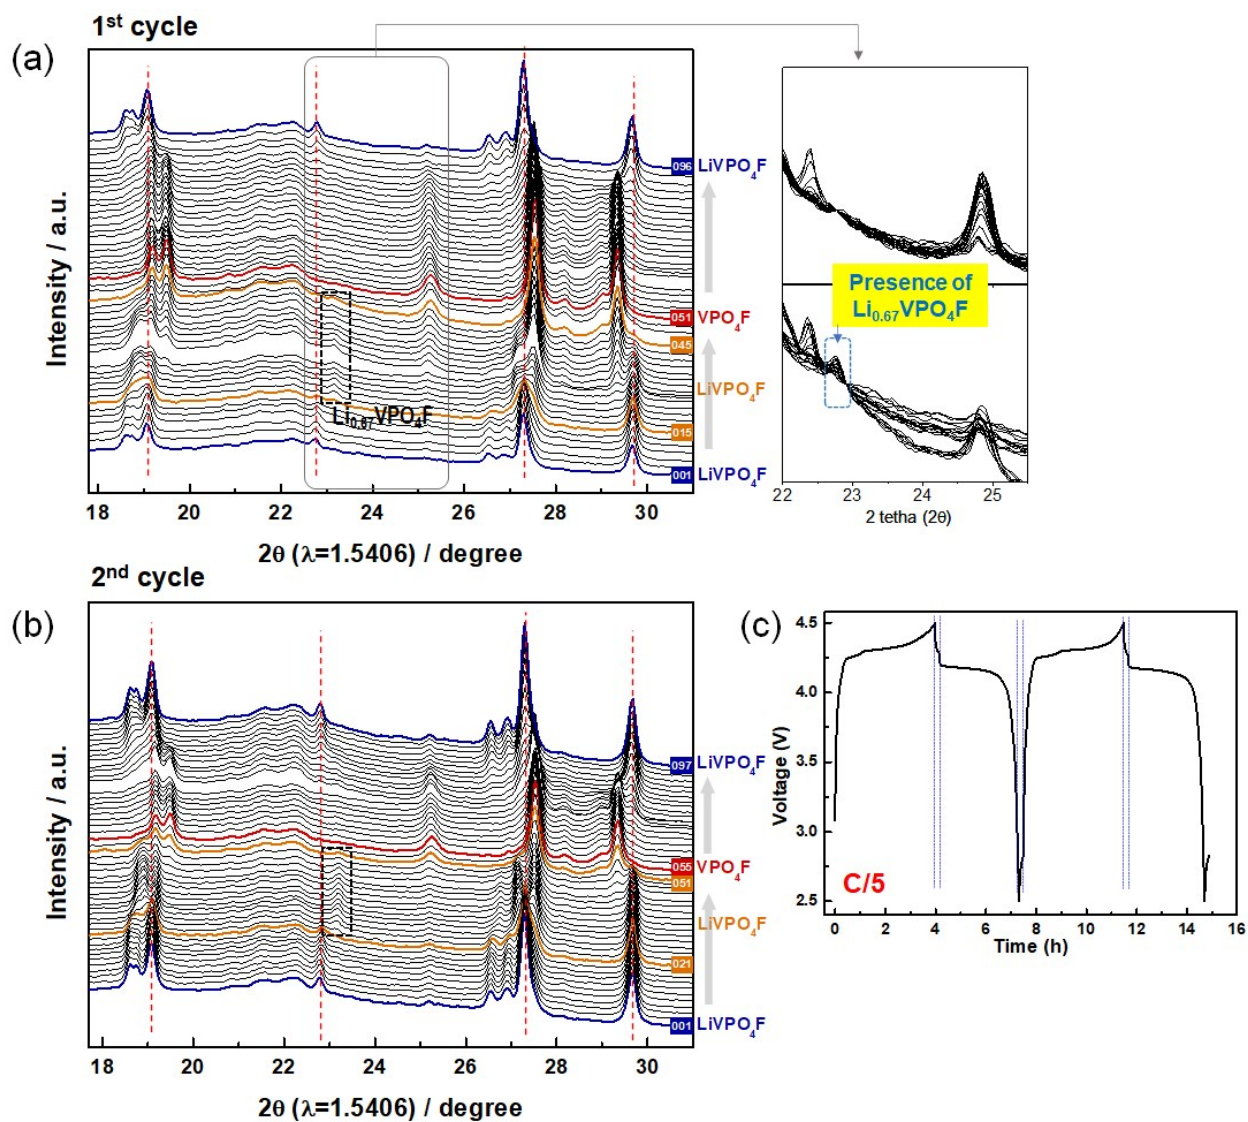

**Figure S3.** Operando synchrotron XRD patterns of CTR-LiVPO<sub>4</sub>F for 2 cycles. XRD diffraction patterns represent at (b) 1<sup>st</sup> cycle and (c) 2<sup>nd</sup> cycle. Red dash vertical lines indicate main peaks of LiVPO<sub>4</sub>F. (c) its voltage profile for 2 cycles. It was charged at C/5 rate and discharged at C/5 rate. The cell was rested for 10 mins after each step during charge/discharge (blue dash vertical lines)

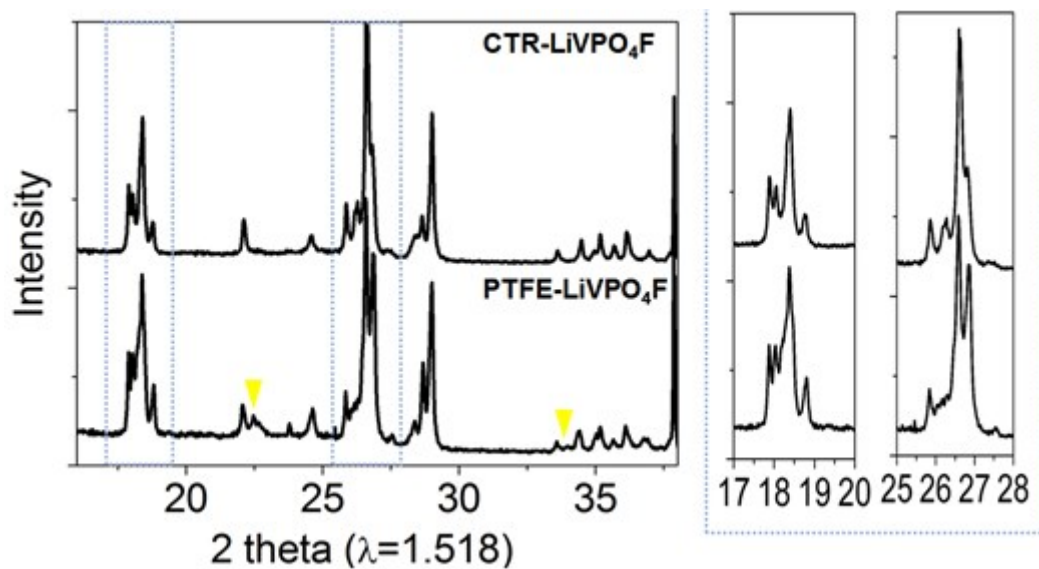

**Figure S4.** High resolution powder synchrotron XRD patterns of *ex situ* electrodes of CTR-LiVPO<sub>4</sub>F and PTFE-LiVPO<sub>4</sub>F at DOD50 (Depth of Discharge 50%), which is a Li<sub>0.5</sub>VPO<sub>4</sub>F with the lithiation, at a C/5 rate.(▼: Li<sub>0.67</sub>VPO<sub>4</sub>F). Main peak shapes were different due to the introduction of the intermediate phase.

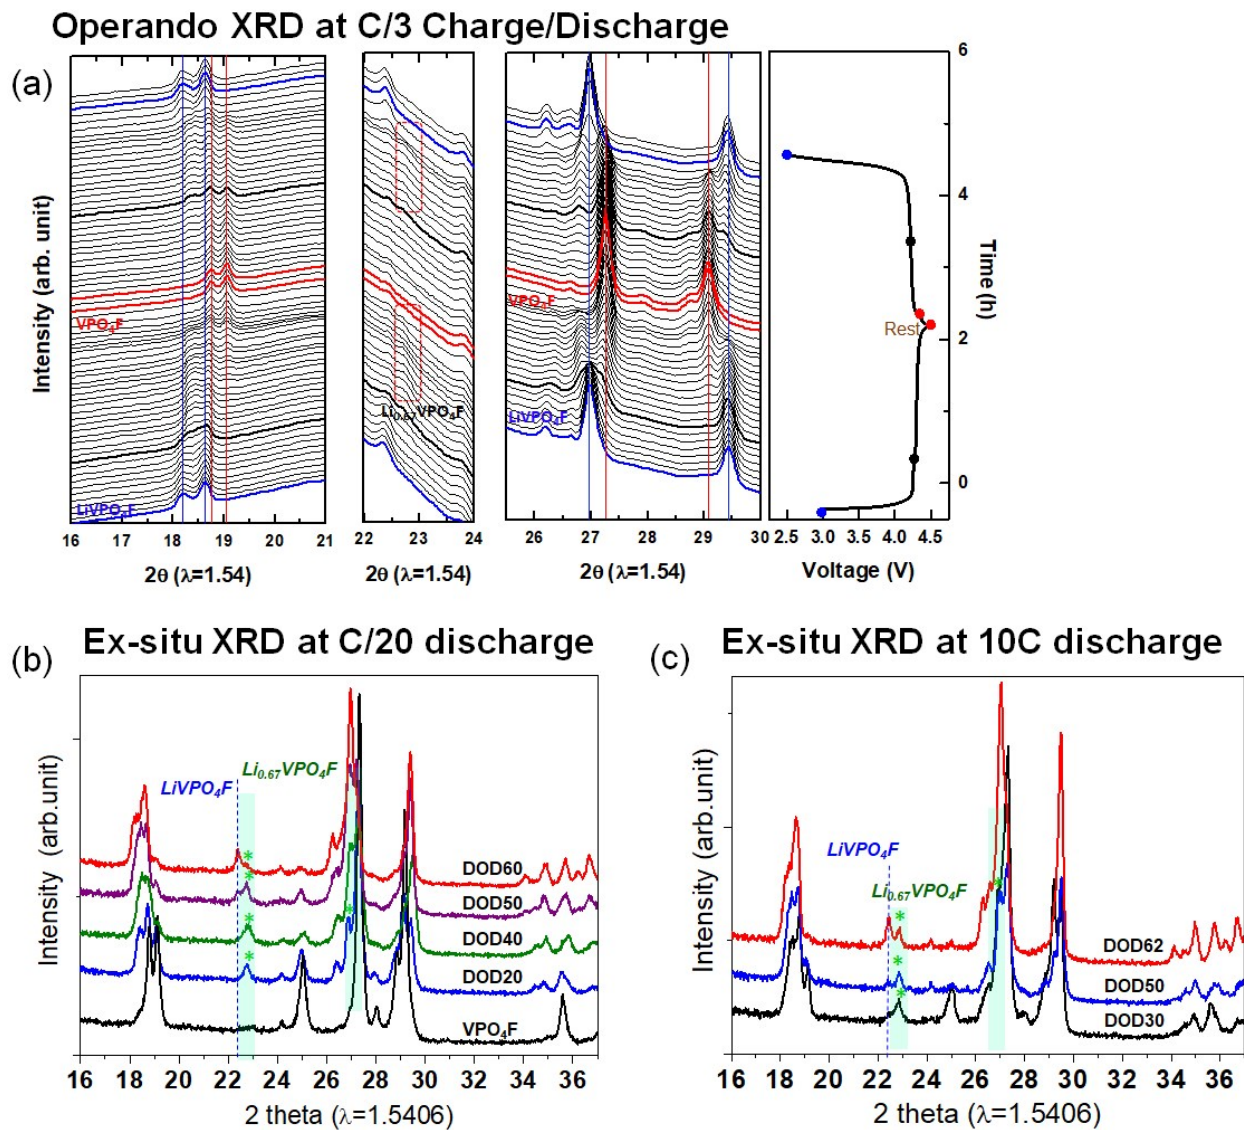

**Figure S5.** Phase transformation behaviors in PTFE- $\text{LiVPO}_4\text{F}$  at various C-rates (a) Operando synchrotron XRD patterns at C/3 charge rate and C/3 discharge rate and its voltage profile. *Ex situ* XRD patterns at (b) C/20 discharge rate and (c) 10C discharge rate. Both cells were charged at C/5 rate. Depth of Discharge (DOD) was described on each XRD pattern.



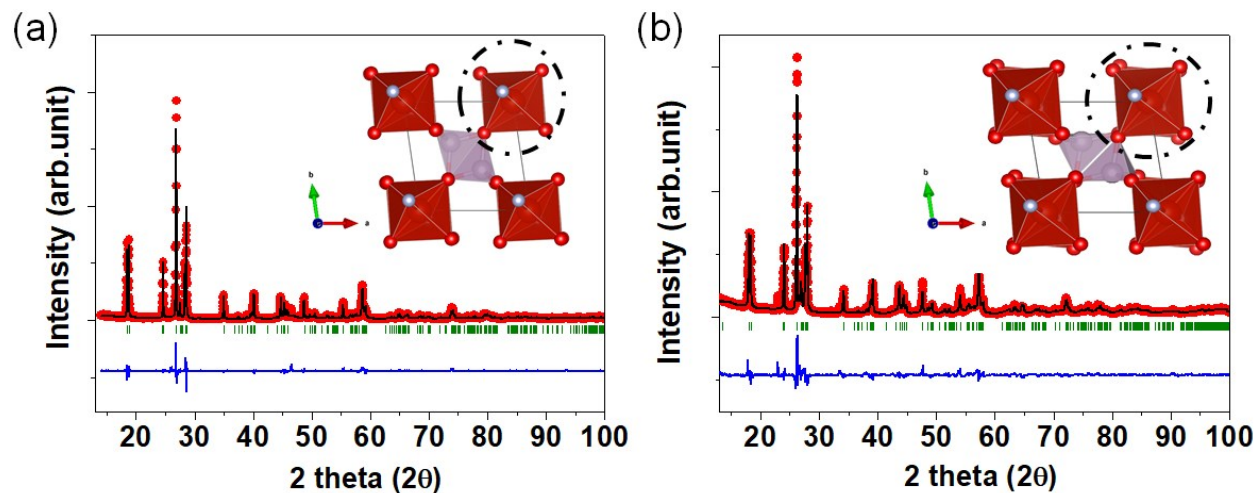

**Figure S6.** Synchrotron XRD patterns of chemically delithiated (a) CTR-VPO<sub>4</sub>F and (b) PTFE-VPO<sub>4</sub>F. Monoclinic VPO<sub>4</sub>F structure is converted to triclinic with assuming VPO<sub>4</sub>F forms by fully extracting Li ions from triclinic LiVPO<sub>4</sub>F. Rietveld refinement was conducted using triclinic VPO<sub>4</sub>F. More details are our previous study.<sup>2</sup> Based on the calculation, the dihedral angle of VO<sub>4</sub>F<sub>2</sub> octahedra in VPO<sub>4</sub>F can be an indicator for the amount of the oxygen defects in the materials. The dihedral angle of VO<sub>4</sub>F<sub>2</sub> octahedra in VPO<sub>4</sub>F is ~ 2.2° and ~ 4° for experimentally synthesized CTR-VPO<sub>4</sub>F and PTFE-VPO<sub>4</sub>F, respectively. This indicates that PTFE-LiVPO<sub>4</sub>F can have less amount of the oxygen defects than CTR-LiVPO<sub>4</sub>F

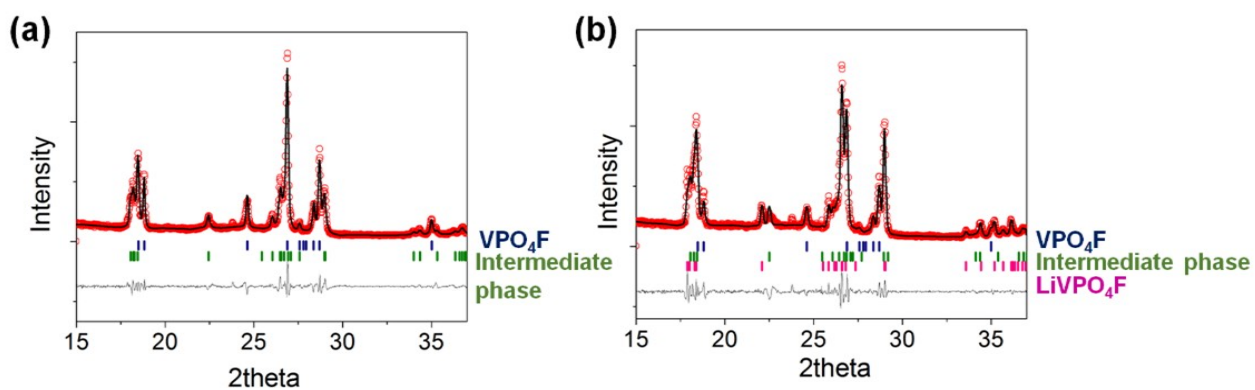

**Figure S7.** Synchrotron XRD patterns of *ex situ* electrodes of PTFE-LiVPO<sub>4</sub>F at (a) DOD20, which is a Li<sub>0.2</sub>VPO<sub>4</sub>F with the lithiation of 20 % Li, and (b) DOD50, which is a Li<sub>0.5</sub>VPO<sub>4</sub>F with the lithiation of 50 % Li. These XRD patterns were analyzed by a profile matching. Red dots represent an observed data, black lines represents the theoretical Bragg patterns of the phases. Gray line is the difference between the observed pattern and the theoretical one. (R-factor: 5.89, Chi<sup>2</sup>: 4.04 in (a), R-factor: 5.53, Chi<sup>2</sup>: 4.57 in (b))

### CTR

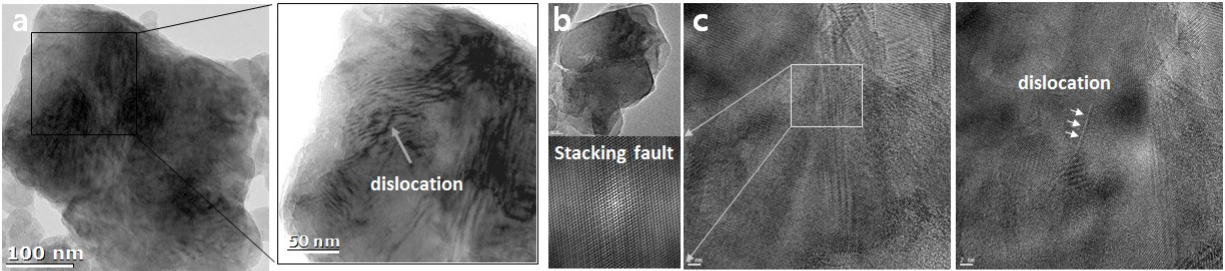

### PTFE

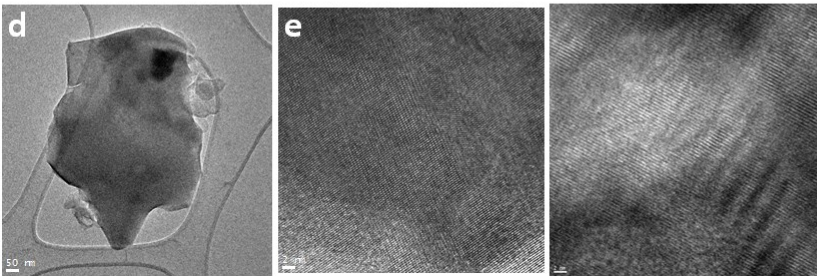

**Figure S8.** TEM measurements of particles in electrochemically lithiated two samples with DOD50. Structural analyses of the CTR- $\text{Li}_{0.5}\text{VPO}_4\text{F}$  (a) Low magnification image with its enlarged image of the dislocation part, (b) Low magnification image and (c) its high resolution image of stacking faults and dislocations. Structural analyses of the PTFE- $\text{Li}_{0.5}\text{VPO}_4\text{F}$  (d) Low magnification image and (e) its high resolution image. Much more structural defects such as stacking faults and dislocations are observed in the CTR- $\text{LiVPO}_4\text{F}$  than the PTFE- $\text{LiVPO}_4\text{F}$ .

## Reference

1. P. F. Xiao, M. O. Lai and L. Lu, *Solid State Ionics*, 2013, **242**, 10-19.
2. H. Park, M. Kim, S. Kang and B. Kang, *Journal of Materials Chemistry A*, 2019, **7**, 13060-13070.
